# Supplementary material
Source: PubMed Central journal article supplement (PMC1326246)

## SUPPLEMENTAL MATERIAL.

### Supplemental Figure Legends.

#### Supplemental Figure 1. Map of the *RAA1* locus.

A: Cloning of the *RAA1* locus. Phage  $\lambda$  P23 contains a DNA fragment from the *raa1-314B* mutant, with part of the *ARG* marker used for insertional mutagenesis. Cosmid #2 was isolated from a wild-type genomic library, using a fragment of  $\lambda$  P23 as probe.

B: Restriction map of the *RAA1* locus. Open bars represent the 18 exons of *Raa1*. The ATG start codon and the STOP codon are indicated.

C: The *Raa1* cDNA. The cDNA is depicted with an open bar, as deduced from the overlapping cDNA clones (thin lines). The five black triangles represent the 38 amino-acid repeats (see figure 4).

D: The midgene construct (mWT) contains a genomic fragment fused, at the Sal I site in exon 6, to the cDNA for the 3' part of the gene. The construct is tagged with three copies of the HA epitope (HA3).

#### Supplemental Figure 2. The *raa1-314B* and *L137H* mutants are allelic.

A. To test whether *raa1-314B* and *L137H* are allelic, vegetative diploids were constructed and analyzed for genetic complementation. A deletion mutant for another factor also involved in *psaA* trans-splicing (*raa2-A18*) was used as a positive control. The two pairs of parental strains were used to generate diploids by PEG-mediated fusion as depicted by the brackets and arrows. The relevant genetic markers are indicated in parenthesis:  $\text{Paro}^{\text{R}}$  (insertion of the *aphVIII* cassette conferring resistance to paromomycin);  $\text{Spc}^{\text{R}}$  (chloroplast mutation conferring resistance to spectinomycin); pARG7.8 (insertion of the *Arg7* gene used for insertional mutagenesis); *raa2A* (partial deletion in *raa2-A18*); *RAA1*, *RAA2* (wild-type alleles).

B. PCR genotyping of the parental strains and of two selected diploids from each fusion. The primers for *Raa2* amplification are within the region that is deleted in *raa2-A18*.

C. Immunoblot analysis with anti-PsaA serum of total protein extracts from the diploids and the parental strains (upper panels). Anti-Rubisco serum was used as a control (ss Rubisco, lower panels). The control diploids, *raa2-A18* / *raa1-314B* (strains 3 and 8), were phototrophic (not shown) and had wild-type amounts of PsaA, showing complementation of *Raa1* and *Raa2*. In contrast, the *raa1-314B* / *L137H* diploids (strains 1 and 2) were not phototrophic and did not accumulate detectable levels of PsaA, showing lack of complementation.

Supplemental Table I.

Oligonucleotides used in this work (5'→3').

|                             |                                |
|-----------------------------|--------------------------------|
| <b>cDNA library:</b>        |                                |
| i2                          | AAACCCGCCGCTGCTTGAA            |
| m3                          | CCTTGCGGCGGACCAA               |
| <b>Deletion constructs:</b> |                                |
| Paro Bgl 5'                 | CGAAGATCTAATGTGAGTTAGCTCACTC   |
| Paro 3'                     | TATGACCATGATTACGCCAAG          |
| Paro Kpn 5'                 | GCGGTACCGATAATGTGAGTTAGCTCACTC |
| Paro Mlu 5'                 | ACGCGTAATGTGAGTTAGCTCACTC      |
| Paro Mlu 3'                 | ACGCGTATGACCATGATTACGCCAAG     |
| <b>Complementation :</b>    |                                |
| Paro2-5'                    | GTCCGTTTCGATCGCAGTCTCG         |
| Paro2-3'                    | CGCTCCAGCTCGGCGAGAAG           |
| pBRBam2                     | GTTCTCGGAGCACTGTCCGAC          |
| ArgSau2                     | GGACGGGTGTGACAGAGTTAC          |
| A18/rbcS                    | GGACGCGGGCAGGGG                |
| A18/Nci1                    | TCACCGTTGGCACTACCAGCG          |
| <b>RT-PCR:</b>              |                                |
| AUG 2                       | GTGCACTCTCCGCATCACCATC         |
| middle 4                    | TCCGTCGTTGCCTGCCGCATG          |
| AUG 5'-1                    | CGATTCGGGGCTCAGATGAGG          |
| AUG 3'-1                    | CACTGCGTCCCTCCAAACCG           |
| m5'-3                       | CCTCATGCCGCTGATGACGGG          |
| m3'-3                       | CTCGTTGCGAGCGCCATGAGC          |
| STOP5'-6                    | GTGCTGCTGTATTGCGCAGTAG         |
| STOP3'-6                    | CGCCCAGCACCAGGCCAATG           |
| UP                          | GACGTCATCCACTGCCTGTG           |
| DOWN                        | CGACGCATCCTCAACACACC           |
| Arg7ex11                    | CCGACATGCTCGCCACGGACTT         |

# Supplementary Figure 1

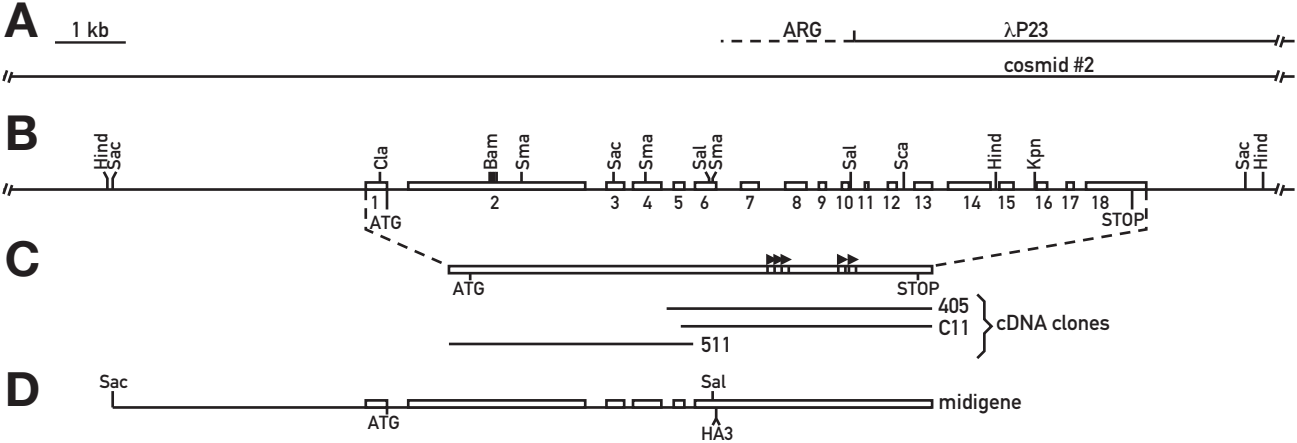

# Supplementary Figure 2

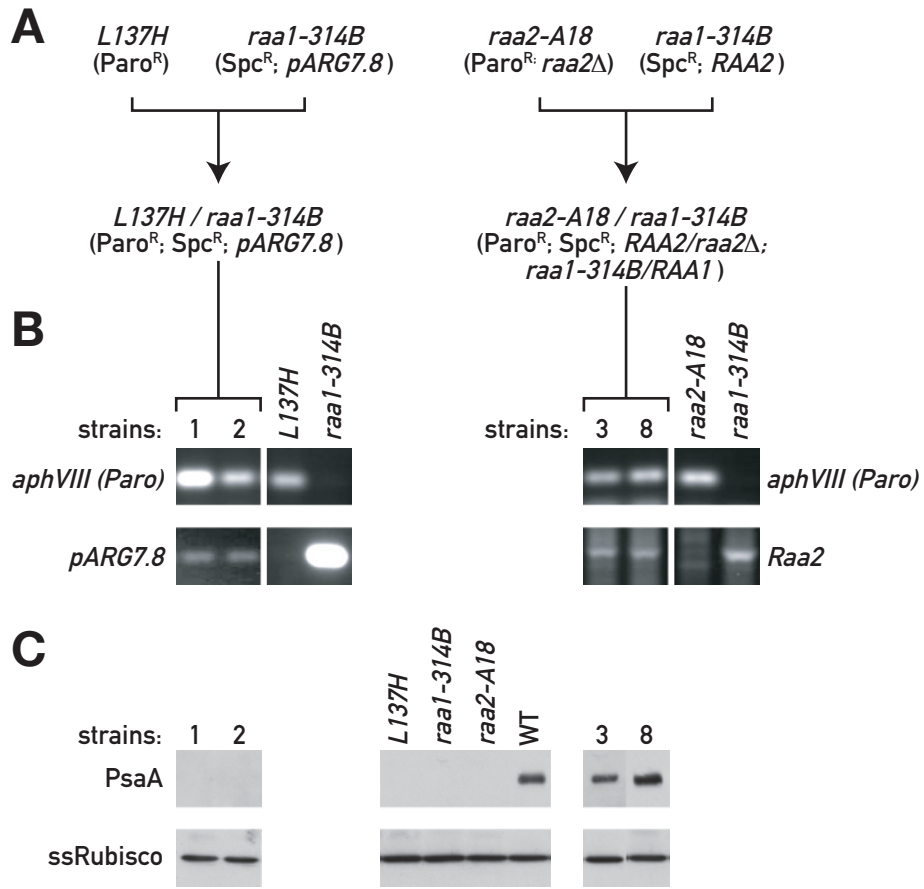

Supplement: nar_34_1_262__1.pdf [file nar_34_1_262__1.pdf]
